# Supplementary material for: A new type of three-dimensional framework constructed from dodecanuclear cadmium(ii) macrocyclesElectronic supplementary information (ESI) available: Synthesis of 1 Figures S1–S4. See http://www.rsc.org/suppdata/cc/b2/b212425d/This work was supported by the National Nature Science Foundation of China, Nature Science Foundation of Fujian Province and the Key Project of Chinese Academy of Science.
Source: Royal Society of Chemistry journal article supplement (doi:10.1039/b212425d), 2003-03-24
Supplement: b212425d.doc [file b212425d.doc]

**Supplementary Materials**

**for [{Cd12(dpa)6(pya)6}(pya)6(dpe)3]n**

## Synthesis of 1.

## Fig. S1. A view of one-dimensional pillar in 1 along *a* axis with dpe omitted

## for clarity.

## Fig. S2The thermogravimetric analysis (TGA) diagram

##### Fig. S3 The differential thermal analysis (DTA) diagram

**Fig. S4. The X-ray power diffraction (XRPD) pattern (a) taken at room**

**temperature (b) after heating at 220 oC for 2h (c)after heating**

**at 300 oC for 2h.**

Synthesis of **1**: A mixture of diphenic acid (0.12 g, 0.5 mmol), 1,2-di(4-pyridyl)ethylene (0.09 g, 0.5 mmol), Cd(NO3)2·4H2O (0.15 g, 0.5 mmol), NaOH (0.03 g, 0.75 mmol) and H2O (14 mL) in a molar ratio of about 1:1:1:1.5:1500 was placed in a Parr Teflon-lined stainless steel vessel and heated to 180 oC for 72 h, then cooled the reaction system to room temperature during 5 hours. A larger amount of colorless crystals were obtained and collected by filtration, washed with water and dried in air, yield 0.16 g (80%, based on Cd(NO3)2·4H2O). Elementary analysis: calcd. for C32H21Cd2N3O8: C, 48.02; H, 2.62; N, 5.25%, found: C, 48.07; H, 2.67; N, 5.34%. IR (KBr pellet): 3418(w), 3061(w), 1618(s), 1601(s), 1579(s), 1547(s), 1504(w), 1439(m), 1392(s), 1375(s), 1358(s), 1147(w), 1016(w), 860(w), 758(m), 715(m), 683(m), 552(w) cm1.

## Fig. S1. A view of one-dimensional pillar in 1 along *a* axis with dpe omitted

for clarity.


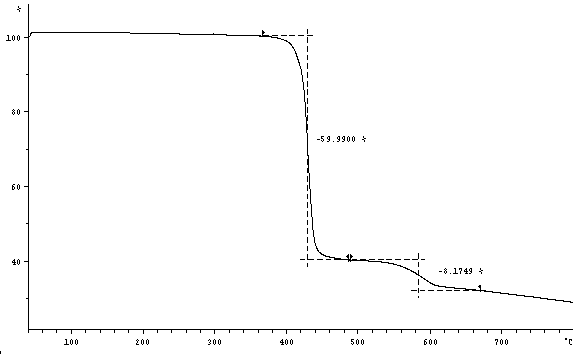


Fig. S2. TGA diagram


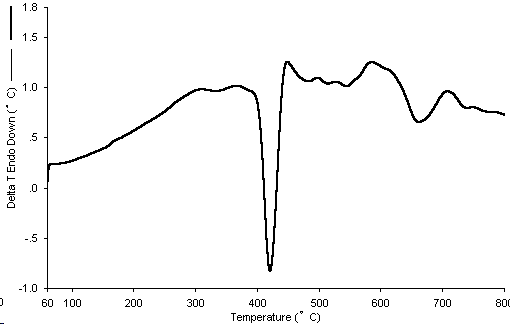


Fig. S3. DTA diagram


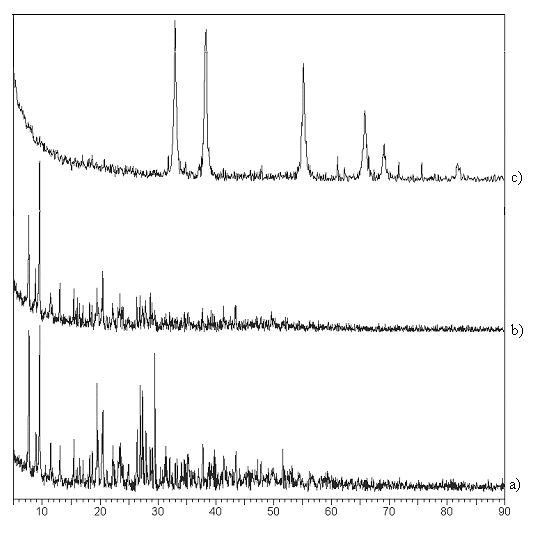


Fig. S4. The X-ray power diffraction (XRPD) pattern (a) taken at room

temperature (b) after heating at 280 oC for 2h (c)after heating

at 300 oC for 2h.
